# Supplementary material for: Varroa destructor weakens honey bee external immunity by impairing melittin production
Source: Research Square preprint supplement (doi:10.21203/rs.3.rs-6238801/v1), 2025-04-25

**Supplementary material for**

*Varroa destructor* weakens the honey bee external immunity system by impairing melittin production

**Michelina Pusceddu1,2*, Simon Tragust3*, Panagiotis Theodorou3, Irene Ciabattini Bolla1, Jorge Sánchez Navarro1, Francesco Corrias4, Alessandro Atzei4, Alberto Angioni****4, Ignazio Floris1,2, Alberto Satta1,2**

1 Department of Agricultural Sciences, Section of Plant Pathology and Entomology, University of Sassari, Sassari, Italy, 2 National Biodiversity Future Center (NBFC), Palermo, Italy, 3 General Zoology, Institute of Biology, Martin Luther University Halle-Wittenberg, Halle (Saale), Germany, 4 Department of Life and Environmental Sciences, University of Cagliari, Cagliari, Italy

**Corresponding authors:* [mpusceddu@uniss.it](mailto:mpusceddu@uniss.it) (MP); [simon.tragust@zoologie.uni-halle.de](mailto:simon.tragust@zoologie.uni-halle.de) (ST)

**Table S1 Characteristic m/z ions during the ionization of melittin (MW 2646.75) operating in ESI mode.**

| Ion | m/z* |
| --- | --- |
| MH+2 | 1423.88 |
| MH+3 | 949.59 |
| MH+4 | 712.44 |
| MH+5 | 570.16 |
| MH+6 | 475.30 |

*m/z: mass to charge ratio

ESI: electrospray ionization

**Table S2 Optimized MS/MS conditions for the target analyte in positive ESI mode using the LC-MS/MS method in the MRM* setting.**

| Precursor ion (m/z) | Product ion (m/z) | Fragmentor (v) | Collision energy (v) |
| --- | --- | --- | --- |
| 713 | 143 | 150 | 42 |
| 86 | 150 | 58 |

*MRM: multiple reaction monitoring

**Table S3 Linear range, linear equation, correlation coefficient, LOQ, apparent recovery (%), precision (RSDr, and RSDwr; n=), uncertainty (U) of melittin using the LC-MS/MS method.**

| Analyte | Linearity  (µg mL-1) | Linear regression equation | R2 ± RSD% | LOQ  (µg mL-1) | Apparent recovery (%) | | RSDr% | RSDwr% | U |
| --- | --- | --- | --- | --- | --- | --- | --- | --- | --- |
| LOQ | 10 x LOQ | LOQ | LOQ |  |
| Melittin | 0.1 – 5.0 | y=66954.8x + 31352.9 | 0.997 ± 0.33 | 0.1 | 87.1±9.4 | 81.7±13.5 | 12.6 | 17.7 | 21.2 |
| 93.7±2.4 | 90.3±3.3 | 10.5 | 15.3 | 14.7 |

Linearity: the calibration curve linearity was measured between 0.1 and 5.0 µg mL-1

LOQ: limit of quantification.

RSDr%: relative standard deviation intraday repeatability

RSDwr: relative standard deviation interday repeatability

Apparent recovery (%): average percent of ‘measured concentration/spiked amount’.

U: expanded uncertainty, U = k x u′; u′ = 𝑢′(𝑏𝑖𝑎𝑠)2 + 𝑢′(𝑝𝑟𝑒𝑐𝑖𝑠𝑖𝑜𝑛)2, k = 2 (coverage factor), to accomplish a level of confidence of 95%.

**Figure S1 Chromatograms of melittin in positive ESI mode using the LC-MS/MS method in the MRM setting.**


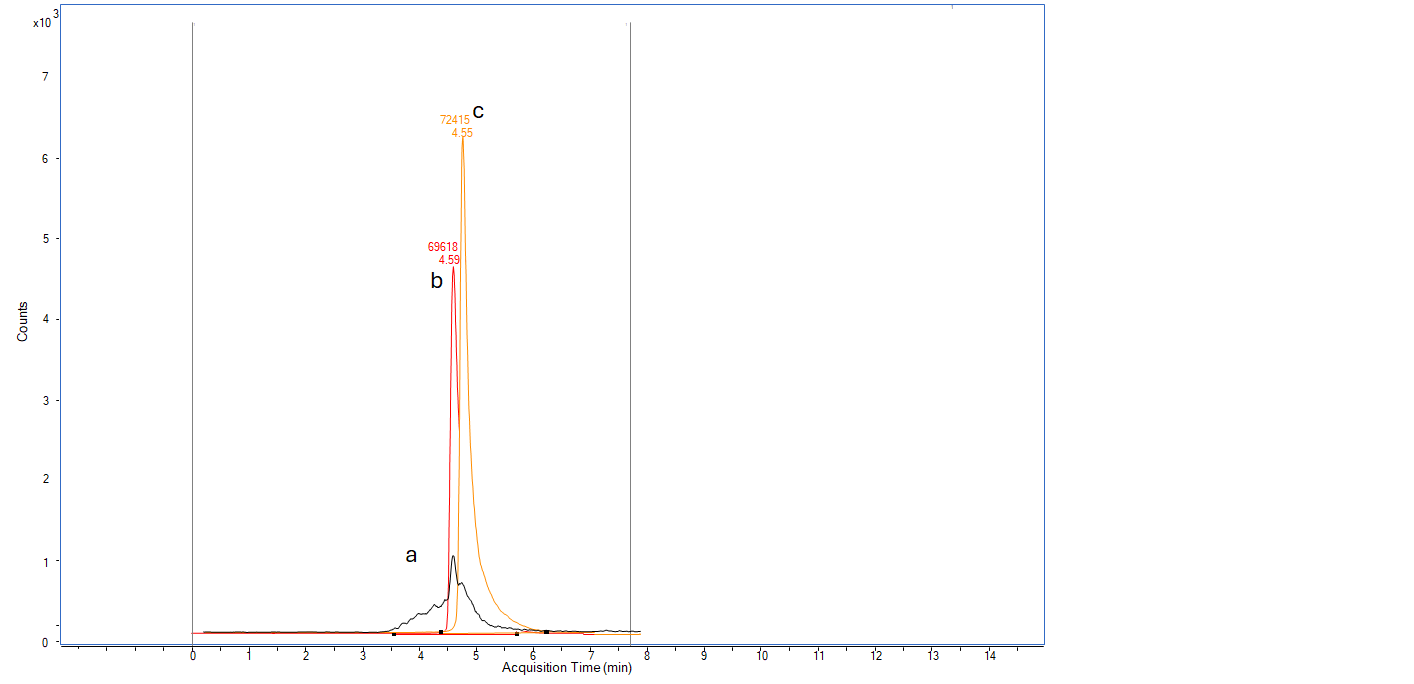


a) blank control, b) std at 250 µg L-1, and c) melittin residue on worker bees.

**Graphical abstract**
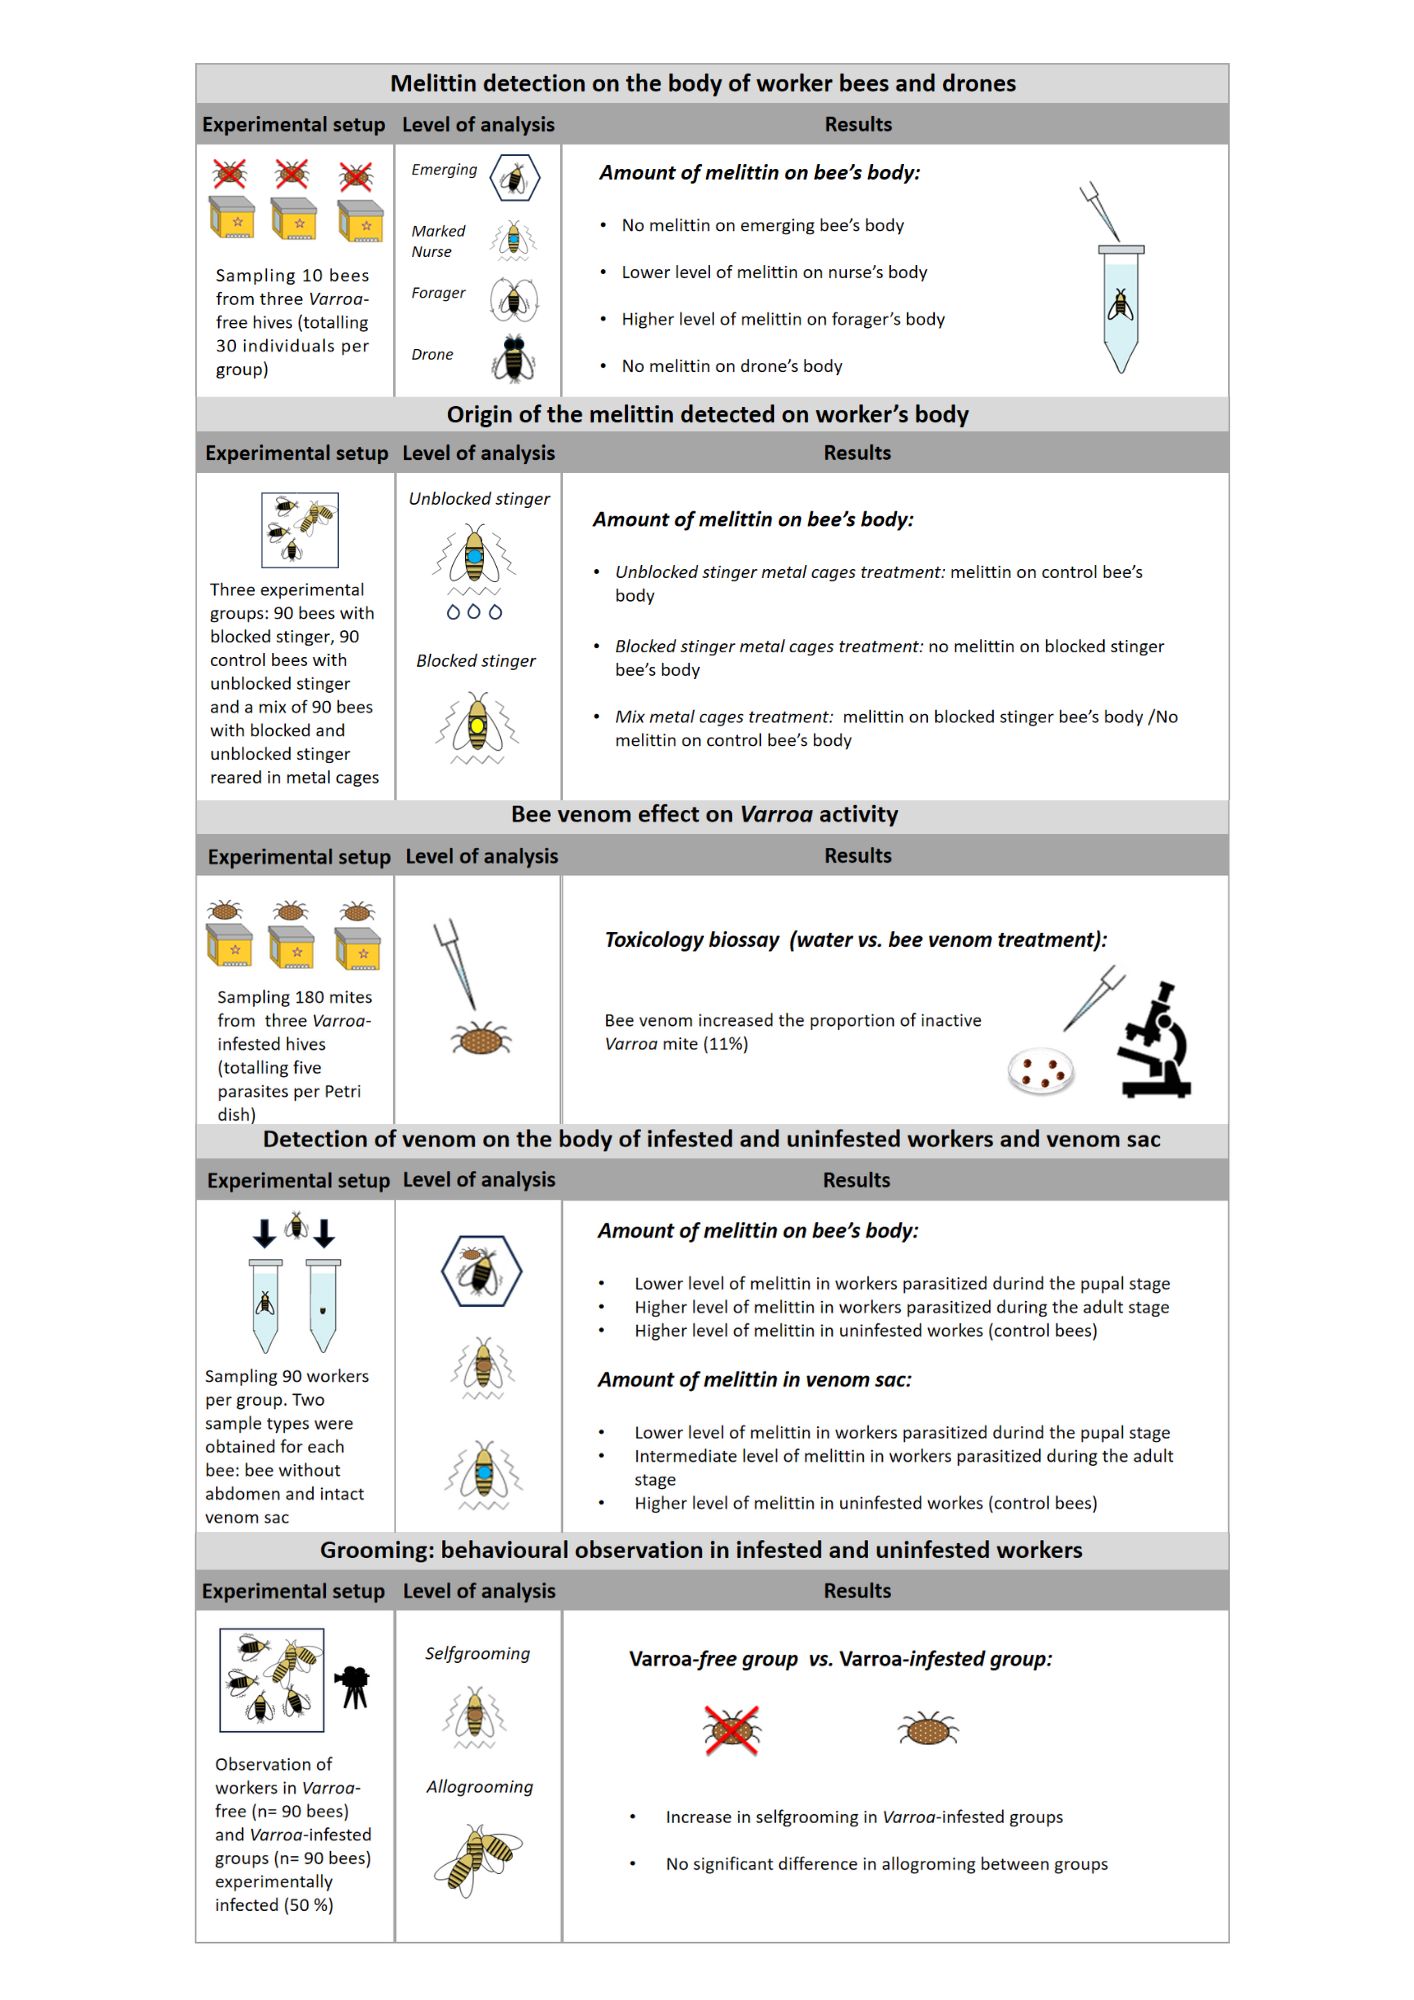

Supplement: Supplementary file 2 [file e6c621fc3471e77047f823e6.docx]
