# Supplementary material for: Varroa destructor weakens honey bee external immunity by impairing melittin production
Source: Research Square preprint supplement (doi:10.21203/rs.3.rs-6238801/v1), 2025-04-25
Supplement: Supplementary file 1 [file a498350b646f617fb9966e60.xlsx]

## Sheet: Table S4 
DATE SAMPLING	COLONY	BEE TYPE	SAMPLE CODE	Melittin (mg/L)	BEE AGE	LEGEND TABLE S4 Melittin (mg/L) on the bee-body: Emerging vs Nurse vs forager vs Drone
2023-09-03	A	Emerging	E1	0	0	Emerging: freshly emerged bees
2023-09-03	A	Emerging	E2	0	0	Nurce: Nurce bees
2023-09-03	A	Emerging	E3	0	0	Forager: forager bees
2023-09-03	A	Emerging	E4	0	0	Drone: male
2023-09-03	A	Emerging	E5	0	0
2023-09-03	A	Emerging	E6	0	0
2023-09-03	A	Emerging	E7	0	0
2023-09-03	A	Emerging	E8	0	0
2023-09-03	A	Emerging	E9	0	0
2023-09-03	A	Emerging	E10	0	0
2023-09-03	B	Emerging	E11	0	0
2023-09-03	B	Emerging	E12	0	0
2023-09-03	B	Emerging	E13	0	0
2023-09-03	B	Emerging	E14	0	0
2023-09-03	B	Emerging	E15	0	0
2023-09-03	B	Emerging	E16	0	0
2023-09-03	B	Emerging	E17	0	0
2023-09-03	B	Emerging	E18	0	0
2023-09-03	B	Emerging	E19	0	0
2023-09-03	B	Emerging	E20	0	0
2023-09-03	C	Emerging	E21	0	0
2023-09-03	C	Emerging	E22	0	0
2023-09-03	C	Emerging	E23	0	0
2023-09-03	C	Emerging	E24	0	0
2023-09-03	C	Emerging	E25	0	0
2023-09-03	C	Emerging	E26	0	0
2023-09-03	C	Emerging	E27	0	0
2023-09-03	C	Emerging	E28	0	0
2023-09-03	C	Emerging	E29	0	0
2023-09-03	C	Emerging	E30	0	0
2023-09-03	A	Drone	D1	0	?
2023-09-03	A	Drone	D2	0	?
2023-09-03	A	Drone	D3	0	?
2023-09-03	A	Drone	D4	0	?
2023-09-03	A	Drone	D5	0	?
2023-09-03	A	Drone	D6	0	?
2023-09-03	A	Drone	D7	0	?
2023-09-03	A	Drone	D8	0	?
2023-09-03	A	Drone	D9	0	?
2023-09-03	A	Drone	D10	0	?
2023-09-03	B	Drone	D11	0	?
2023-09-03	B	Drone	D12	0	?
2023-09-03	B	Drone	D13	0	?
2023-09-03	B	Drone	D14	0	?
2023-09-03	B	Drone	D15	0	?
2023-09-03	B	Drone	D16	0	?
2023-09-03	B	Drone	D17	0	?
2023-09-03	B	Drone	D18	0	?
2023-09-03	B	Drone	D19	0	?
2023-09-03	B	Drone	D20	0	?
2023-09-03	C	Drone	D21	0	?
2023-09-03	C	Drone	D22	0	?
2023-09-03	C	Drone	D23	0	?
2023-09-03	C	Drone	D24	0	?
2023-09-03	C	Drone	D25	0	?
2023-09-03	C	Drone	D26	0	?
2023-09-03	C	Drone	D27	0	?
2023-09-03	C	Drone	D28	0	?
2023-09-03	C	Drone	D29	0	?
2023-09-03	C	Drone	D30	0	?
2023-09-03	A	Forager	F1	9.73	?
2023-09-03	A	Forager	F2	3.09	?
2023-09-03	A	Forager	F3	1.33	?
2023-09-03	A	Forager	F4	0.29	?
2023-09-03	A	Forager	F5	6.75	?
2023-09-03	A	Forager	F6	3.51	?
2023-09-03	A	Forager	F7	4.48	?
2023-09-03	A	Forager	F8	17.00	?
2023-09-03	A	Forager	F9	6.82	?
2023-09-03	A	Forager	F10	8.60	?
2023-09-03	B	Forager	F11	17.54	?
2023-09-03	B	Forager	F12	4.45	?
2023-09-03	B	Forager	F13	5.31	?
2023-09-03	B	Forager	F14	2.04	?
2023-09-03	B	Forager	F15	8.13	?
2023-09-03	B	Forager	F16	3.00	?
2023-09-03	B	Forager	F17	0.48	?
2023-09-03	B	Forager	F18	0.31	?
2023-09-03	B	Forager	F19	0.40	?
2023-09-03	B	Forager	F20	5.47	?
2023-09-03	C	Forager	F21	2.91	?
2023-09-03	C	Forager	F22	9.11	?
2023-09-03	C	Forager	F23	6.83	?
2023-09-03	C	Forager	F24	2.03	?
2023-09-03	C	Forager	F25	0.45	?
2023-09-03	C	Forager	F26	1.14	?
2023-09-03	C	Forager	F27	0.43	?
2023-09-03	C	Forager	F28	10.41	?
2023-09-03	C	Forager	F29	5.88	?
2023-09-03	C	Forager	F30	25.02	?
2023-09-03	A	Nurse	N1	0.13	7
2023-09-03	A	Nurse	N2	3.23	7
2023-09-03	A	Nurse	N3	1.50	7
2023-09-03	A	Nurse	N4	3.06	7
2023-09-03	A	Nurse	N5	0.74	7
2023-09-03	A	Nurse	N6	0.96	7
2023-09-03	A	Nurse	N7	1.61	7
2023-09-03	A	Nurse	N8	5.93	7
2023-09-03	A	Nurse	N9	0.86	7
2023-09-03	A	Nurse	N10	0.85	7
2023-09-03	B	Nurse	N11	3.14	7
2023-09-03	B	Nurse	N12	3.63	7
2023-09-03	B	Nurse	N13	3.59	7
2023-09-03	B	Nurse	N14	1.52	7
2023-09-03	B	Nurse	N15	0.58	7
2023-09-03	B	Nurse	N16	1.79	7
2023-09-03	B	Nurse	N17	0.45	7
2023-09-03	B	Nurse	N18	0.02	7
2023-09-03	B	Nurse	N19	0.01	7
2023-09-03	B	Nurse	N20	3.54	7
2023-09-03	C	Nurse	N21	0.64	7
2023-09-03	C	Nurse	N22	4.24	7
2023-09-03	C	Nurse	N23	9.72	7
2023-09-03	C	Nurse	N24	3.56	7
2023-09-03	C	Nurse	N25	3.89	7
2023-09-03	C	Nurse	N26	1.39	7
2023-09-03	C	Nurse	N27	0.43	7
2023-09-03	C	Nurse	N28	1.0	7
2023-09-03	C	Nurse	N29	3.09	7
2023-09-03	C	Nurse	N30	1.03	7

## Sheet: Table S5
DATE START EXP	DATA SAMPLING	TREATMENT	CAGE	SAMPLE CODE	Melittin (mg/L)	BEE AGE	LEGEND S5 Melittin on the bee-body: Control vs Stinger blocked vs MIX
2023-06-11	2023-06-18	CONTROL	CA	CA1	0.57	7	Control: untreated bees (no stinger blocked) (30 bees per cage)
2023-06-11	2023-06-18	CONTROL	CA	CA2	0.15	7	Stinger blocked: 30 bees with stinger blocked (30 bees per cage)
2023-06-11	2023-06-18	CONTROL	CA	CA3	<LOQ	7	MIX: 15 control bees + 15 bees with stinger blocked in the same cage (30 bees per cage)
2023-06-11	2023-06-18	CONTROL	CA	CA4	2.13	7
2023-06-11	2023-06-18	CONTROL	CA	CA5	0.15	7
2023-06-11	2023-06-18	CONTROL	CA	CA6	0.64	7
2023-06-11	2023-06-18	CONTROL	CA	CA7	0.12	7
2023-06-11	2023-06-18	CONTROL	CA	CA8	0.30	7
2023-06-11	2023-06-18	CONTROL	CA	CA9	0.16	7
2023-06-11	2023-06-18	CONTROL	CA	CA10	0.14	7
2023-06-11	2023-06-18	CONTROL	CA	CA11	1.47	7
2023-06-11	2023-06-18	CONTROL	CA	CA12	0.20	7
2023-06-11	2023-06-18	CONTROL	CA	CA13	0.23	7
2023-06-11	2023-06-18	CONTROL	CA	CA14	<LOQ	7
2023-06-11	2023-06-18	CONTROL	CA	CA15	0.12	7
2023-06-11	2023-06-18	CONTROL	CA	CA16	0.36	7
2023-06-11	2023-06-18	CONTROL	CA	CA17	0.24	7
2023-06-11	2023-06-18	CONTROL	CA	CA18	1.02	7
2023-06-11	2023-06-18	CONTROL	CA	CA19	3.28	7
2023-06-11	2023-06-18	CONTROL	CA	CA20	0.65	7
2023-06-11	2023-06-18	CONTROL	CA	CA21	0.26	7
2023-06-11	2023-06-18	CONTROL	CA	CA22	0.11	7
2023-06-11	2023-06-18	CONTROL	CA	CA23	0.14	7
2023-06-11	2023-06-18	CONTROL	CA	CA24	<LOQ	7
2023-06-11	2023-06-18	CONTROL	CA	CA25	0.21	7
2023-06-11	2023-06-18	CONTROL	CA	CA26	0.77	7
2023-06-11	2023-06-18	CONTROL	CA	CA27	0.89	7
2023-06-11	2023-06-18	CONTROL	CB	CB1	0.24	7
2023-06-11	2023-06-18	CONTROL	CB	CB2	0.16	7
2023-06-11	2023-06-18	CONTROL	CB	CB3	2.93	7
2023-06-11	2023-06-18	CONTROL	CB	CB4	0.16	7
2023-06-11	2023-06-18	CONTROL	CB	CB5	0.49	7
2023-06-11	2023-06-18	CONTROL	CB	CB6	0.14	7
2023-06-11	2023-06-18	CONTROL	CB	CB7	0.32	7
2023-06-11	2023-06-18	CONTROL	CB	CB8	0.18	7
2023-06-11	2023-06-18	CONTROL	CB	CB9	0.28	7
2023-06-11	2023-06-18	CONTROL	CB	CB10	<LOQ	7
2023-06-11	2023-06-18	CONTROL	CB	CB11	0.40	7
2023-06-11	2023-06-18	CONTROL	CB	CB12	1.20	7
2023-06-11	2023-06-18	CONTROL	CB	CB13	1.88	7
2023-06-11	2023-06-18	CONTROL	CB	CB14	0.28	7
2023-06-11	2023-06-18	CONTROL	CB	CB15	2.75	7
2023-06-11	2023-06-18	CONTROL	CB	CB16	1.14	7
2023-06-11	2023-06-18	CONTROL	CB	CB17	0.14	7
2023-06-11	2023-06-18	CONTROL	CB	CB18	0.12	7
2023-06-11	2023-06-18	CONTROL	CB	CB19	1.23	7
2023-06-11	2023-06-18	CONTROL	CB	CB20	0.40	7
2023-06-11	2023-06-18	CONTROL	CB	CB21	0.44	7
2023-06-11	2023-06-18	CONTROL	CB	CB22	0.29	7
2023-06-11	2023-06-18	CONTROL	CB	CB23	0.20	7
2023-06-11	2023-06-18	CONTROL	CB	CB24	0.11	7
2023-06-11	2023-06-18	CONTROL	CB	CB25	0.18	7
2023-06-11	2023-06-18	CONTROL	CB	CB26	0.14	7
2023-06-11	2023-06-18	CONTROL	CB	CB27	0.43	7
2023-06-11	2023-06-18	CONTROL	CB	CB28	0.45	7
2023-06-11	2023-06-18	CONTROL	CB	CB29	0.42	7
2023-06-11	2023-06-18	CONTROL	CC	CC1	0.22	7
2023-06-11	2023-06-18	CONTROL	CC	CC2	0.30	7
2023-06-11	2023-06-18	CONTROL	CC	CC3	0.32	7
2023-06-11	2023-06-18	CONTROL	CC	CC4	<LOQ	7
2023-06-11	2023-06-18	CONTROL	CC	CC5	0.70	7
2023-06-11	2023-06-18	CONTROL	CC	CC6	0.10	7
2023-06-11	2023-06-18	CONTROL	CC	CC7	<LOQ	7
2023-06-11	2023-06-18	CONTROL	CC	CC8	0.11	7
2023-06-11	2023-06-18	CONTROL	CC	CC9	0.10	7
2023-06-11	2023-06-18	CONTROL	CC	CC10	<LOQ	7
2023-06-11	2023-06-18	CONTROL	CC	CC11	0.27	7
2023-06-11	2023-06-18	CONTROL	CC	CC12	0.38	7
2023-06-11	2023-06-18	CONTROL	CC	CC13	<LOQ	7
2023-06-11	2023-06-18	CONTROL	CC	CC14	2.62	7
2023-06-11	2023-06-18	CONTROL	CC	CC15	0.32	7
2023-06-11	2023-06-18	CONTROL	CC	CC16	1.15	7
2023-06-11	2023-06-18	CONTROL	CC	CC17	0.52	7
2023-06-11	2023-06-18	CONTROL	CC	CC18	0.44	7
2023-06-11	2023-06-18	CONTROL	CC	CC19	<LOQ	7
2023-06-11	2023-06-18	CONTROL	CC	CC20	0.30	7
2023-06-11	2023-06-18	CONTROL	CC	CC21	0.16	7
2023-06-11	2023-06-18	CONTROL	CC	CC22	0.37	7
2023-06-11	2023-06-18	CONTROL	CC	CC23	0.12	7
2023-06-11	2023-06-18	CONTROL	CC	CC24	0.14	7
2023-06-11	2023-06-18	CONTROL	CC	CC25	0.10	7
2023-06-11	2023-06-18	CONTROL	CC	CC26	0.11	7
2023-06-11	2023-06-18	CONTROL	CC	CC27	0.11	7
2023-06-11	2023-06-18	CONTROL	CC	CC28	0.34	7
2023-06-11	2023-06-18	CONTROL	CC	CC29	<LOQ	7
2023-06-11	2023-06-18	CONTROL	CC	CC30	0.10	7
2023-06-11	2023-06-18	STINGER BLOCKED	SBA	SBA1	0	7
2023-06-11	2023-06-18	STINGER BLOCKED	SBA	SBA2	0	7
2023-06-11	2023-06-18	STINGER BLOCKED	SBA	SBA3	0	7
2023-06-11	2023-06-18	STINGER BLOCKED	SBA	SBA4	0	7
2023-06-11	2023-06-18	STINGER BLOCKED	SBA	SBA5	0	7
2023-06-11	2023-06-18	STINGER BLOCKED	SBA	SBA6	0	7
2023-06-11	2023-06-18	STINGER BLOCKED	SBA	SBA7	0	7
2023-06-11	2023-06-18	STINGER BLOCKED	SBA	SBA8	0	7
2023-06-11	2023-06-18	STINGER BLOCKED	SBA	SBA9	0	7
2023-06-11	2023-06-18	STINGER BLOCKED	SBA	SBA10	0	7
2023-06-11	2023-06-18	STINGER BLOCKED	SBA	SBA11	0	7
2023-06-11	2023-06-18	STINGER BLOCKED	SBA	SBA12	0	7
2023-06-11	2023-06-18	STINGER BLOCKED	SBA	SBA13	0	7
2023-06-11	2023-06-18	STINGER BLOCKED	SBA	SBA14	0	7
2023-06-11	2023-06-18	STINGER BLOCKED	SBA	SBA15	0	7
2023-06-11	2023-06-18	STINGER BLOCKED	SBA	SBA16	0	7
2023-06-11	2023-06-18	STINGER BLOCKED	SBA	SBA17	0	7
2023-06-11	2023-06-18	STINGER BLOCKED	SBA	SBA18	0	7
2023-06-11	2023-06-18	STINGER BLOCKED	SBA	SBA19	0	7
2023-06-11	2023-06-18	STINGER BLOCKED	SBA	SBA20	0	7
2023-06-11	2023-06-18	STINGER BLOCKED	SBA	SBA21	0	7
2023-06-11	2023-06-18	STINGER BLOCKED	SBA	SBA22	0	7
2023-06-11	2023-06-18	STINGER BLOCKED	SBA	SBA23	0	7
2023-06-11	2023-06-18	STINGER BLOCKED	SBA	SBA24	0	7
2023-06-11	2023-06-18	STINGER BLOCKED	SBA	SBA25	0	7
2023-06-11	2023-06-18	STINGER BLOCKED	SBA	SBA26	0	7
2023-06-11	2023-06-18	STINGER BLOCKED	SBA	SBA27	0	7
2023-06-11	2023-06-18	STINGER BLOCKED	SBA	SBA28	0	7
2023-06-11	2023-06-18	STINGER BLOCKED	SBB	SBB1	0	7
2023-06-11	2023-06-18	STINGER BLOCKED	SBB	SBB2	0	7
2023-06-11	2023-06-18	STINGER BLOCKED	SBB	SBB3	0	7
2023-06-11	2023-06-18	STINGER BLOCKED	SBB	SBB4	0	7
2023-06-11	2023-06-18	STINGER BLOCKED	SBB	SBB5	0	7
2023-06-11	2023-06-18	STINGER BLOCKED	SBB	SBB6	0	7
2023-06-11	2023-06-18	STINGER BLOCKED	SBB	SBB7	0	7
2023-06-11	2023-06-18	STINGER BLOCKED	SBB	SBB8	0	7
2023-06-11	2023-06-18	STINGER BLOCKED	SBB	SBB9	0	7
2023-06-11	2023-06-18	STINGER BLOCKED	SBB	SBB10	0	7
2023-06-11	2023-06-18	STINGER BLOCKED	SBB	SBB11	0	7
2023-06-11	2023-06-18	STINGER BLOCKED	SBB	SBB12	0	7
2023-06-11	2023-06-18	STINGER BLOCKED	SBB	SBB13	0	7
2023-06-11	2023-06-18	STINGER BLOCKED	SBB	SBB14	0	7
2023-06-11	2023-06-18	STINGER BLOCKED	SBB	SBB15	0	7
2023-06-11	2023-06-18	STINGER BLOCKED	SBB	SBB16	0	7
2023-06-11	2023-06-18	STINGER BLOCKED	SBB	SBB17	0	7
2023-06-11	2023-06-18	STINGER BLOCKED	SBB	SBB18	0	7
2023-06-11	2023-06-18	STINGER BLOCKED	SBB	SBB19	0	7
2023-06-11	2023-06-18	STINGER BLOCKED	SBB	SBB20	0	7
2023-06-11	2023-06-18	STINGER BLOCKED	SBB	SBB21	0	7
2023-06-11	2023-06-18	STINGER BLOCKED	SBB	SBB22	0	7
2023-06-11	2023-06-18	STINGER BLOCKED	SBB	SBB23	0	7
2023-06-11	2023-06-18	STINGER BLOCKED	SBB	SBB24	0	7
2023-06-11	2023-06-18	STINGER BLOCKED	SBB	SBB25	0	7
2023-06-11	2023-06-18	STINGER BLOCKED	SBB	SBB26	0	7
2023-06-11	2023-06-18	STINGER BLOCKED	SBB	SBB27	0	7
2023-06-11	2023-06-18	STINGER BLOCKED	SBB	SBB28	0	7
2023-06-11	2023-06-18	STINGER BLOCKED	SBB	SBB29	0	7
2023-06-11	2023-06-18	STINGER BLOCKED	SBC	SBC1	0	7
2023-06-11	2023-06-18	STINGER BLOCKED	SBC	SBC2	0	7
2023-06-11	2023-06-18	STINGER BLOCKED	SBC	SBC3	0	7
2023-06-11	2023-06-18	STINGER BLOCKED	SBC	SBC4	0	7
2023-06-11	2023-06-18	STINGER BLOCKED	SBC	SBC5	0	7
2023-06-11	2023-06-18	STINGER BLOCKED	SBC	SBC6	0	7
2023-06-11	2023-06-18	STINGER BLOCKED	SBC	SBC7	0	7
2023-06-11	2023-06-18	STINGER BLOCKED	SBC	SBC8	0	7
2023-06-11	2023-06-18	STINGER BLOCKED	SBC	SBC9	0	7
2023-06-11	2023-06-18	STINGER BLOCKED	SBC	SBC10	0	7
2023-06-11	2023-06-18	STINGER BLOCKED	SBC	SBC11	0	7
2023-06-11	2023-06-18	STINGER BLOCKED	SBC	SBC12	0	7
2023-06-11	2023-06-18	STINGER BLOCKED	SBC	SBC13	0	7
2023-06-11	2023-06-18	STINGER BLOCKED	SBC	SBC14	0	7
2023-06-11	2023-06-18	STINGER BLOCKED	SBC	SBC15	0	7
2023-06-11	2023-06-18	STINGER BLOCKED	SBC	SBC16	0	7
2023-06-11	2023-06-18	STINGER BLOCKED	SBC	SBC17	0	7
2023-06-11	2023-06-18	STINGER BLOCKED	SBC	SBC18	0	7
2023-06-11	2023-06-18	STINGER BLOCKED	SBC	SBC19	0	7
2023-06-11	2023-06-18	STINGER BLOCKED	SBC	SBC20	0	7
2023-06-11	2023-06-18	STINGER BLOCKED	SBC	SBC21	0	7
2023-06-11	2023-06-18	STINGER BLOCKED	SBC	SBC22	0	7
2023-06-11	2023-06-18	STINGER BLOCKED	SBC	SBC23	0	7
2023-06-11	2023-06-18	STINGER BLOCKED	SBC	SBC24	0	7
2023-06-11	2023-06-18	STINGER BLOCKED	SBC	SBC25	0	7
2023-06-11	2023-06-18	STINGER BLOCKED	SBC	SBC26	0	7
2023-06-11	2023-06-18	STINGER BLOCKED	SBC	SBC27	0	7
2023-06-11	2023-06-18	STINGER BLOCKED	SBC	SBC28	0	7
2023-06-11	2023-06-18	STINGER BLOCKED	SBC	SBC29	0	7
2023-06-11	2023-06-18	MIX control	MA	MA1	0	7
2023-06-11	2023-06-18	MIX control	MA	MA2	<LOQ	7
2023-06-11	2023-06-18	MIX control	MA	MA3	<LOQ	7
2023-06-11	2023-06-18	MIX control	MA	MA4	0.56	7
2023-06-11	2023-06-18	MIX control	MA	MA5	<LOQ	7
2023-06-11	2023-06-18	MIX control	MA	MA6	0.3	7
2023-06-11	2023-06-18	MIX control	MA	MA7	<LOQ	7
2023-06-11	2023-06-18	MIX control	MA	MA8	<LOQ	7
2023-06-11	2023-06-18	MIX control	MA	MA9	0.27	7
2023-06-11	2023-06-18	MIX control	MA	MA10	0.48	7
2023-06-11	2023-06-18	MIX control	MA	MA11	0.24	7
2023-06-11	2023-06-18	MIX control	MA	MA12	1.09	7
2023-06-11	2023-06-18	MIX control	MA	MA13	<LOQ	7
2023-06-11	2023-06-18	MIX control	MA	MA14	<LOQ	7
2023-06-11	2023-06-18	MIX control	MA	MA15	0.20	7
2023-06-11	2023-06-18	MIX stinger blocked	MA	MA16	0	7
2023-06-11	2023-06-18	MIX stinger blocked	MA	MA17	0	7
2023-06-11	2023-06-18	MIX stinger blocked	MA	MA18	0	7
2023-06-11	2023-06-18	MIX stinger blocked	MA	MA19	<LOQ	7
2023-06-11	2023-06-18	MIX stinger blocked	MA	MA20	0	7
2023-06-11	2023-06-18	MIX stinger blocked	MA	MA21	0	7
2023-06-11	2023-06-18	MIX stinger blocked	MA	MA22	0	7
2023-06-11	2023-06-18	MIX stinger blocked	MA	MA23	<LOQ	7
2023-06-11	2023-06-18	MIX stinger blocked	MA	MA24	0	7
2023-06-11	2023-06-18	MIX stinger blocked	MA	MA25	<LOQ	7
2023-06-11	2023-06-18	MIX stinger blocked	MA	MA26	0	7
2023-06-11	2023-06-18	MIX stinger blocked	MA	MA27	<LOQ	7
2023-06-11	2023-06-18	MIX stinger blocked	MA	MA28	0	7
2023-06-11	2023-06-18	MIX stinger blocked	MA	MA29	<LOQ	7
2023-06-11	2023-06-18	MIX stinger blocked	MA	MA30	<LOQ	7
2023-06-11	2023-06-18	MIX control	MB	MB1	<LOQ	7
2023-06-11	2023-06-18	MIX control	MB	MB2	<LOQ	7
2023-06-11	2023-06-18	MIX control	MB	MB3	<LOQ	7
2023-06-11	2023-06-18	MIX control	MB	MB4	<LOQ	7
2023-06-11	2023-06-18	MIX control	MB	MB5	<LOQ	7
2023-06-11	2023-06-18	MIX control	MB	MB6	<LOQ	7
2023-06-11	2023-06-18	MIX control	MB	MB7	0.16	7
2023-06-11	2023-06-18	MIX control	MB	MB8	0.13	7
2023-06-11	2023-06-18	MIX control	MB	MB9	<LOQ	7
2023-06-11	2023-06-18	MIX control	MB	MB10	0.22	7
2023-06-11	2023-06-18	MIX control	MB	MB11	0.15	7
2023-06-11	2023-06-18	MIX control	MB	MB12	0.26	7
2023-06-11	2023-06-18	MIX control	MB	MB13	<LOQ	7
2023-06-11	2023-06-18	MIX control	MB	MB14	<LOQ	7
2023-06-11	2023-06-18	MIX control	MB	MB15	0.15	7
2023-06-11	2023-06-18	MIX stinger blocked	MB	MB16	0	7
2023-06-11	2023-06-18	MIX stinger blocked	MB	MB17	<LOQ	7
2023-06-11	2023-06-18	MIX stinger blocked	MB	MB18	0	7
2023-06-11	2023-06-18	MIX stinger blocked	MB	MB19	<LOQ	7
2023-06-11	2023-06-18	MIX stinger blocked	MB	MB20	0	7
2023-06-11	2023-06-18	MIX stinger blocked	MB	MB21	0	7
2023-06-11	2023-06-18	MIX stinger blocked	MB	MB22	0	7
2023-06-11	2023-06-18	MIX stinger blocked	MB	MB23	0	7
2023-06-11	2023-06-18	MIX stinger blocked	MB	MB24	<LOQ	7
2023-06-11	2023-06-18	MIX stinger blocked	MB	MB25	<LOQ	7
2023-06-11	2023-06-18	MIX stinger blocked	MB	MB26	0	7
2023-06-11	2023-06-18	MIX stinger blocked	MB	MB27	<LOQ	7
2023-06-11	2023-06-18	MIX stinger blocked	MB	MB28	0	7
2023-06-11	2023-06-18	MIX stinger blocked	MB	MB29	<LOQ	7
2023-06-11	2023-06-18	MIX stinger blocked	MB	MB30	<LOQ	7
2023-06-11	2023-06-18	MIX control	MC	MC1	0.12	7
2023-06-11	2023-06-18	MIX control	MC	MC2	<LOQ	7
2023-06-11	2023-06-18	MIX control	MC	MC3	0.12	7
2023-06-11	2023-06-18	MIX control	MC	MC4	<LOQ	7
2023-06-11	2023-06-18	MIX control	MC	MC5	0.22	7
2023-06-11	2023-06-18	MIX control	MC	MC6	<LOQ	7
2023-06-11	2023-06-18	MIX control	MC	MC7	0.12	7
2023-06-11	2023-06-18	MIX control	MC	MC8	0.47	7
2023-06-11	2023-06-18	MIX control	MC	MC9	0.14	7
2023-06-11	2023-06-18	MIX control	MC	MC10	0.11	7
2023-06-11	2023-06-18	MIX control	MC	MC11	<LOQ	7
2023-06-11	2023-06-18	MIX control	MC	MC12	<LOQ	7
2023-06-11	2023-06-18	MIX control	MC	MC13	<LOQ	7
2023-06-11	2023-06-18	MIX control	MC	MC14	0.33	7
2023-06-11	2023-06-18	MIX stinger blocked	MC	MC15	0	7
2023-06-11	2023-06-18	MIX stinger blocked	MC	MC16	0	7
2023-06-11	2023-06-18	MIX stinger blocked	MC	MC17	<LOQ	7
2023-06-11	2023-06-18	MIX stinger blocked	MC	MC18	<LOQ	7
2023-06-11	2023-06-18	MIX stinger blocked	MC	MC19	<LOQ	7
2023-06-11	2023-06-18	MIX stinger blocked	MC	MC20	0	7
2023-06-11	2023-06-18	MIX stinger blocked	MC	MC21	<LOQ	7
2023-06-11	2023-06-18	MIX stinger blocked	MC	MC22	<LOQ	7
2023-06-11	2023-06-18	MIX stinger blocked	MC	MC23	0	7
2023-06-11	2023-06-18	MIX stinger blocked	MC	MC24	<LOQ	7
2023-06-11	2023-06-18	MIX stinger blocked	MC	MC25	0	7
2023-06-11	2023-06-18	MIX stinger blocked	MC	MC26	0	7
2023-06-11	2023-06-18	MIX stinger blocked	MC	MC27	<LOQ	7
2023-06-11	2023-06-18	MIX stinger blocked	MC	MC28	0	7
2023-06-11	2023-06-18	MIX stinger blocked	MC	MC29	0	7

## Sheet: Table S6
DATA START EXP	DATA SAMPLING	STATUS	CAGE	SAMPLE CODE	Melittin (mg/L) bee-body	Melittin (mg/L) venom-gland	BEE AGE	LEGEND S6 Melittin (mg/L) on the bee-body and venom-gland: Varroa-free vs Varroa infested
2023-07-18	2023-07-22	Varroa free	CA	CA1	0.24	7.19	4	Varroa free: uninfested bees
2023-07-18	2023-07-22	Varroa free	CA	CA2	0.10	3.32	4	Phoretic infestation:Varroa infested bees at adult stage
2023-07-18	2023-07-22	Varroa free	CA	CA3	0.04	4.04	4	Cell infestation: Varroa infested bees during pupal stage
2023-07-18	2023-07-22	Varroa free	CA	CA4	0.11	0.46	4
2023-07-18	2023-07-22	Varroa free	CA	CA5	0.12	3.10	4
2023-07-18	2023-07-22	Varroa free	CA	CA6	0.04	0.05	4
2023-07-18	2023-07-22	Varroa free	CA	CA7	0.04	1.52	4
2023-07-18	2023-07-22	Varroa free	CA	CA8	0.73	0.53	4
2023-07-18	2023-07-22	Varroa free	CA	CA9	0.03	2.34	4
2023-07-18	2023-07-22	Varroa free	CA	CA10	0.06	4.92	4
2023-07-18	2023-07-22	Varroa free	CA	CA11	0.10	5.01	4
2023-07-18	2023-07-22	Varroa free	CA	CA12	0.06	3.26	4
2023-07-18	2023-07-22	Varroa free	CA	CA13	0.08	0.51	4
2023-07-18	2023-07-22	Varroa free	CA	CA14	0.10	3.95	4
2023-07-18	2023-07-22	Varroa free	CA	CA15	0.05	2.54	4
2023-07-18	2023-07-22	Varroa free	CA	CA16	0.07	2.36	4
2023-07-18	2023-07-22	Varroa free	CA	CA17	0.15	1.59	4
2023-07-18	2023-07-22	Varroa free	CA	CA18	0.23	0.68	4
2023-07-18	2023-07-22	Varroa free	CA	CA19	0.09	2.74	4
2023-07-18	2023-07-22	Varroa free	CA	CA20	0.09	5.01	4
2023-07-18	2023-07-22	Varroa free	CA	CA21	0.18	3.19	4
2023-07-18	2023-07-22	Varroa free	CA	CA22	0.03	1.84	4
2023-07-18	2023-07-22	Varroa free	CA	CA23	0.04	4.01	4
2023-07-18	2023-07-22	Varroa free	CA	CA24	0.06	2.22	4
2023-07-18	2023-07-22	Varroa free	CA	CA25	0.07	1.25	4
2023-07-18	2023-07-22	Varroa free	CA	CA26	0.25	3.75	4
2023-07-18	2023-07-22	Varroa free	CA	CA27	0.35	2.64	4
2023-07-18	2023-07-22	Varroa free	CA	CA28	0.69	4.01	4
2023-07-18	2023-07-22	Varroa free	CA	CA29	0.10	3.21	4
2023-07-18	2023-07-22	Varroa free	CA	CA30	0.31	1.89	4
2023-07-18	2023-07-22	Varroa free	CB	CB1	0.13	2.20	4
2023-07-18	2023-07-22	Varroa free	CB	CB2	0.18	4.84	4
2023-07-18	2023-07-22	Varroa free	CB	CB3	0.05	1.08	4
2023-07-18	2023-07-22	Varroa free	CB	CB4	0.18	1.44	4
2023-07-18	2023-07-22	Varroa free	CB	CB5	0.04	0.27	4
2023-07-18	2023-07-22	Varroa free	CB	CB6	0.08	0.14	4
2023-07-18	2023-07-22	Varroa free	CB	CB7	0	2.34	4
2023-07-18	2023-07-22	Varroa free	CB	CB8	0.04	1.43	4
2023-07-18	2023-07-22	Varroa free	CB	CB9	0.04	0.22	4
2023-07-18	2023-07-22	Varroa free	CB	CB10	0	0.09	4
2023-07-18	2023-07-22	Varroa free	CB	CB11	0	2.56	4
2023-07-18	2023-07-22	Varroa free	CB	CB12	0.03	2.06	4
2023-07-18	2023-07-22	Varroa free	CB	CB13	0.15	1.14	4
2023-07-18	2023-07-22	Varroa free	CB	CB14	0.02	0.56	4
2023-07-18	2023-07-22	Varroa free	CB	CB15	0.04	1.3	4
2023-07-18	2023-07-22	Varroa free	CB	CB16	0.04	1.05	4
2023-07-18	2023-07-22	Varroa free	CB	CB17	0.06	2.04	4
2023-07-18	2023-07-22	Varroa free	CB	CB18	0.09	1.1	4
2023-07-18	2023-07-22	Varroa free	CB	CB19	0.12	0.56	4
2023-07-18	2023-07-22	Varroa free	CB	CB20	0.04	1.38	4
2023-07-18	2023-07-22	Varroa free	CB	CB21	0.05	0.67	4
2023-07-18	2023-07-22	Varroa free	CB	CB22	0.05	1.59	4
2023-07-18	2023-07-22	Varroa free	CB	CB23	0.06	2.37	4
2023-07-18	2023-07-22	Varroa free	CB	CB24	0.08	1.26	4
2023-07-18	2023-07-22	Varroa free	CB	CB25	0.12	2.45	4
2023-07-18	2023-07-22	Varroa free	CB	CB26	0.21	0.19	4
2023-07-18	2023-07-22	Varroa free	CB	CB27	0.14	2.41	4
2023-07-18	2023-07-22	Varroa free	CB	CB28	0.09	2.65	4
2023-07-18	2023-07-22	Varroa free	CB	CB29	0.16	1.34	4
2023-07-18	2023-07-22	Varroa free	CC	CC1	0.04	0.37	4
2023-07-18	2023-07-22	Varroa free	CC	CC2	0.04	0.05	4
2023-07-18	2023-07-22	Varroa free	CC	CC3	0.04	1.53	4
2023-07-18	2023-07-22	Varroa free	CC	CC4	0	0.85	4
2023-07-18	2023-07-22	Varroa free	CC	CC5	0.04	0.05	4
2023-07-18	2023-07-22	Varroa free	CC	CC6	0.04	0.31	4
2023-07-18	2023-07-22	Varroa free	CC	CC7	0.05	1.48	4
2023-07-18	2023-07-22	Varroa free	CC	CC8	1.1	0.43	4
2023-07-18	2023-07-22	Varroa free	CC	CC9	0	0.19	4
2023-07-18	2023-07-22	Varroa free	CC	CC10	0	0.91	4
2023-07-18	2023-07-22	Varroa free	CC	CC11	0.07	1.21	4
2023-07-18	2023-07-22	Varroa free	CC	CC12	0.04	0.85	4
2023-07-18	2023-07-22	Varroa free	CC	CC13	0.07	0.34	4
2023-07-18	2023-07-22	Varroa free	CC	CC14	0.07	0.59	4
2023-07-18	2023-07-22	Varroa free	CC	CC15	0.09	0.47	4
2023-07-18	2023-07-22	Varroa free	CC	CC16	0.04	0.95	4
2023-07-18	2023-07-22	Varroa free	CC	CC17	0.06	0.09	4
2023-07-18	2023-07-22	Varroa free	CC	CC18	0.07	0.32	4
2023-07-18	2023-07-22	Varroa free	CC	CC19	0.03	0.75	4
2023-07-18	2023-07-22	Varroa free	CC	CC20	0.04	0.26	4
2023-07-18	2023-07-22	Varroa free	CC	CC21	0.04	0.58	4
2023-07-18	2023-07-22	Varroa free	CC	CC22	0.06	0.94	4
2023-07-18	2023-07-22	Varroa free	CC	CC23	0.05	0.36	4
2023-07-18	2023-07-22	Varroa free	CC	CC24	0.05	0.55	4
2023-07-18	2023-07-22	Varroa free	CC	CC25	3.3	0.29	4
2023-07-18	2023-07-22	Varroa free	CC	CC26	0.04	0.95	4
2023-07-18	2023-07-22	Varroa free	CC	CC27	0.04	1.02	4
2023-07-18	2023-07-22	Phoretic infestation	PA	PA1	0.12	0.94	4
2023-07-18	2023-07-22	Phoretic infestation	PA	PA2	0.19	0.57	4
2023-07-18	2023-07-22	Phoretic infestation	PA	PA3	0.06	2.88	4
2023-07-18	2023-07-22	Phoretic infestation	PA	PA4	0.08	0.57	4
2023-07-18	2023-07-22	Phoretic infestation	PA	PA5	0.10	2.37	4
2023-07-18	2023-07-22	Phoretic infestation	PA	PA6	0.12	0.13	4
2023-07-18	2023-07-22	Phoretic infestation	PA	PA7	0.14	2.57	4
2023-07-18	2023-07-22	Phoretic infestation	PA	PA8	0.07	0.21	4
2023-07-18	2023-07-22	Phoretic infestation	PA	PA9	0.08	0.08	4
2023-07-18	2023-07-22	Phoretic infestation	PA	PA10	0.05	0.06	4
2023-07-18	2023-07-22	Phoretic infestation	PA	PA11	0.02	0.95	4
2023-07-18	2023-07-22	Phoretic infestation	PA	PA12	0.04	2.91	4
2023-07-18	2023-07-22	Phoretic infestation	PA	PA13	0.15	0.12	4
2023-07-18	2023-07-22	Phoretic infestation	PA	PA14	0.06	0.98	4
2023-07-18	2023-07-22	Phoretic infestation	PA	PA15	0.09	0.61	4
2023-07-18	2023-07-22	Phoretic infestation	PA	PA16	0.18	0.07	4
2023-07-18	2023-07-22	Phoretic infestation	PA	PA17	0.04	1.24	4
2023-07-18	2023-07-22	Phoretic infestation	PA	PA18	0.13	2.46	4
2023-07-18	2023-07-22	Phoretic infestation	PA	PA19	0.05	0.54	4
2023-07-18	2023-07-22	Phoretic infestation	PA	PA20	0.06	0.87	4
2023-07-18	2023-07-22	Phoretic infestation	PA	PA21	0.09	1.05	4
2023-07-18	2023-07-22	Phoretic infestation	PA	PA22	0.09	2.49	4
2023-07-18	2023-07-22	Phoretic infestation	PA	PA23	0.15	0.94	4
2023-07-18	2023-07-22	Phoretic infestation	PA	PA24	0.12	0.51	4
2023-07-18	2023-07-22	Phoretic infestation	PA	PA25	0.09	0.09	4
2023-07-18	2023-07-22	Phoretic infestation	PA	PA26	0.06	0.45	4
2023-07-18	2023-07-22	Phoretic infestation	PA	PA27	0.08	1.08	4
2023-07-18	2023-07-22	Phoretic infestation	PA	PA28	0.16	2.01	4
2023-07-18	2023-07-22	Phoretic infestation	PA	PA29	0.09	0.95	4
2023-07-18	2023-07-22	Phoretic infestation	PA	PA30	0.1	0.54	4
2023-07-18	2023-07-22	Phoretic infestation	PB	PB1	0.04	1.94	4
2023-07-18	2023-07-22	Phoretic infestation	PB	PB2	0.06	0.21	4
2023-07-18	2023-07-22	Phoretic infestation	PB	PB3	0.07	0.66	4
2023-07-18	2023-07-22	Phoretic infestation	PB	PB4	0.06	0.20	4
2023-07-18	2023-07-22	Phoretic infestation	PB	PB5	1.17	1.28	4
2023-07-18	2023-07-22	Phoretic infestation	PB	PB6	0.04	1.16	4
2023-07-18	2023-07-22	Phoretic infestation	PB	PB7	0.08	0.12	4
2023-07-18	2023-07-22	Phoretic infestation	PB	PB8	0.06	1.17	4
2023-07-18	2023-07-22	Phoretic infestation	PB	PB9	0.09	0.29	4
2023-07-18	2023-07-22	Phoretic infestation	PB	PB10	0.09	1.24	4
2023-07-18	2023-07-22	Phoretic infestation	PB	PB11	1.12	1.09	4
2023-07-18	2023-07-22	Phoretic infestation	PB	PB12	0.09	0.56	4
2023-07-18	2023-07-22	Phoretic infestation	PB	PB13	0.05	0.45	4
2023-07-18	2023-07-22	Phoretic infestation	PB	PB14	0.07	1.26	4
2023-07-18	2023-07-22	Phoretic infestation	PB	PB15	0.07	0.2	4
2023-07-18	2023-07-22	Phoretic infestation	PB	PB16	0.03	0.84	4
2023-07-18	2023-07-22	Phoretic infestation	PB	PB17	1.12	0.42	4
2023-07-18	2023-07-22	Phoretic infestation	PB	PB18	0.06	1.06	4
2023-07-18	2023-07-22	Phoretic infestation	PB	PB19	0.05	0.95	4
2023-07-18	2023-07-22	Phoretic infestation	PB	PB20	1.14	0.65	4
2023-07-18	2023-07-22	Phoretic infestation	PB	PB21	0.09	0.78	4
2023-07-18	2023-07-22	Phoretic infestation	PB	PB22	1.11	1.56	4
2023-07-18	2023-07-22	Phoretic infestation	PB	PB23	0.03	0.95	4
2023-07-18	2023-07-22	Phoretic infestation	PC	PC1	0.05	0.51	4
2023-07-18	2023-07-22	Phoretic infestation	PC	PC2	0.16	0.46	4
2023-07-18	2023-07-22	Phoretic infestation	PC	PC3	0.10	0.79	4
2023-07-18	2023-07-22	Phoretic infestation	PC	PC4	0.04	0.71	4
2023-07-18	2023-07-22	Phoretic infestation	PC	PC5	0.04	0.64	4
2023-07-18	2023-07-22	Phoretic infestation	PC	PC6	0.05	1.31	4
2023-07-18	2023-07-22	Phoretic infestation	PC	PC7	0	0.30	4
2023-07-18	2023-07-22	Phoretic infestation	PC	PC8	0.19	1.76	4
2023-07-18	2023-07-22	Phoretic infestation	PC	PC9	0.07	0.66	4
2023-07-18	2023-07-22	Phoretic infestation	PC	PC10	0.81	0.05	4
2023-07-18	2023-07-22	Phoretic infestation	PC	PC11	0.05	0.98	4
2023-07-18	2023-07-22	Phoretic infestation	PC	PC12	0.12	0.45	4
2023-07-18	2023-07-22	Phoretic infestation	PC	PC13	0.09	0.08	4
2023-07-18	2023-07-22	Phoretic infestation	PC	PC14	0.08	1.26	4
2023-07-18	2023-07-22	Phoretic infestation	PC	PC15	0.55	0.85	4
2023-07-18	2023-07-22	Phoretic infestation	PC	PC16	0.19	1.09	4
2023-07-18	2023-07-22	Phoretic infestation	PC	PC17	0.21	0.65	4
2023-07-18	2023-07-22	Phoretic infestation	PC	PC18	0.17	0.35	4
2023-07-18	2023-07-22	Cell infestation	CEA	CEA1	0.09	1.60	4
2023-07-18	2023-07-22	Cell infestation	CEA	CEA2	0.06	0.26	4
2023-07-18	2023-07-22	Cell infestation	CEA	CEA3	0	0.25	4
2023-07-18	2023-07-22	Cell infestation	CEA	CEA4	1.11	0	4
2023-07-18	2023-07-22	Cell infestation	CEA	CEA5	0.04	0.34	4
2023-07-18	2023-07-22	Cell infestation	CEA	CEA6	0.09	0.22	4
2023-07-18	2023-07-22	Cell infestation	CEA	CEA7	0.04	0.04	4
2023-07-18	2023-07-22	Cell infestation	CEA	CEA8	0	1.11	4
2023-07-18	2023-07-22	Cell infestation	CEA	CEA9	0	0.08	4
2023-07-18	2023-07-22	Cell infestation	CEA	CEA10	0	0.21	4
2023-07-18	2023-07-22	Cell infestation	CEA	CEA11	0.04	1.26	4
2023-07-18	2023-07-22	Cell infestation	CEA	CEA12	0.05	0.54	4
2023-07-18	2023-07-22	Cell infestation	CEA	CEA13	0.06	0.09	4
2023-07-18	2023-07-22	Cell infestation	CEA	CEA14	0.05	0.27	4
2023-07-18	2023-07-22	Cell infestation	CEA	CEA15	0.09	0.35	4
2023-07-18	2023-07-22	Cell infestation	CEA	CEA16	0.07	0.98	4
2023-07-18	2023-07-22	Cell infestation	CEA	CEA17	0.06	0.07	4
2023-07-18	2023-07-22	Cell infestation	CEA	CEA18	0.04	0.12	4
2023-07-18	2023-07-22	Cell infestation	CEA	CEA19	0.08	0.46	4
2023-07-18	2023-07-22	Cell infestation	CEB	CEB1	0.18	1.30	4
2023-07-18	2023-07-22	Cell infestation	CEB	CEB2	0	0.07	4
2023-07-18	2023-07-22	Cell infestation	CEB	CEB3	0.04	0.05	4
2023-07-18	2023-07-22	Cell infestation	CEB	CEB4	0.05	0.04	4
2023-07-18	2023-07-22	Cell infestation	CEB	CEB5	0	1.50	4
2023-07-18	2023-07-22	Cell infestation	CEB	CEB6	0	0.45	4
2023-07-18	2023-07-22	Cell infestation	CEB	CEB7	0	0.07	4
2023-07-18	2023-07-22	Cell infestation	CEB	CEB8	0	0.27	4
2023-07-18	2023-07-22	Cell infestation	CEB	CEB9	0.05	0.07	4
2023-07-18	2023-07-22	Cell infestation	CEB	CEB10	0	0.27	4
2023-07-18	2023-07-22	Cell infestation	CEB	CEB11	0.04	1.02	4
2023-07-18	2023-07-22	Cell infestation	CEB	CEB12	0.14	0.56	4
2023-07-18	2023-07-22	Cell infestation	CEB	CEB13	0.03	0.75	4
2023-07-18	2023-07-22	Cell infestation	CEB	CEB14	0.16	0.06	4
2023-07-18	2023-07-22	Cell infestation	CEB	CEB15	0.09	0.19	4
2023-07-18	2023-07-22	Cell infestation	CEB	CEB16	0.05	0.85	4
2023-07-18	2023-07-22	Cell infestation	CEB	CEB17	0.04	0.42	4
2023-07-18	2023-07-22	Cell infestation	CEB	CEB18	0.07	0.09	4
2023-07-18	2023-07-22	Cell infestation	CEB	CEB19	0.08	0.18	4
2023-07-18	2023-07-22	Cell infestation	CEB	CEB20	0.06	0.26	4
2023-07-18	2023-07-22	Cell infestation	CEB	CEB21	0.08	0.37	4
2023-07-18	2023-07-22	Cell infestation	CEB	CEB22	0.12	0.09	4
2023-07-18	2023-07-22	Cell infestation	CEC	CEC1	0	0.04	4
2023-07-18	2023-07-22	Cell infestation	CEC	CEC2	0	0.55	4
2023-07-18	2023-07-22	Cell infestation	CEC	CEC3	0	0	4
2023-07-18	2023-07-22	Cell infestation	CEC	CEC4	0.05	0.17	4
2023-07-18	2023-07-22	Cell infestation	CEC	CEC5	0.08	0.17	4
2023-07-18	2023-07-22	Cell infestation	CEC	CEC6	0.04	0	4
2023-07-18	2023-07-22	Cell infestation	CEC	CEC7	0.04	0	4
2023-07-18	2023-07-22	Cell infestation	CEC	CEC8	0.04	0.04	4
2023-07-18	2023-07-22	Cell infestation	CEC	CEC9	0	0.31	4
2023-07-18	2023-07-22	Cell infestation	CEC	CEC10	0.04	0.05	4
2023-07-18	2023-07-22	Cell infestation	CEC	CEC11	0.05	0.09	4
2023-07-18	2023-07-22	Cell infestation	CEC	CEC12	0	0.06	4
2023-07-18	2023-07-22	Cell infestation	CEC	CEC13	0	0.09	4
2023-07-18	2023-07-22	Cell infestation	CEC	CEC14	0.05	0.16	4

## Sheet: Table S7
DAY	TIMESLOT	GRUPPO	CAGE	ALLOGROOMING	SELFGROOMING	LEGEND Table S7 Behavioural observations (selfgrooming an allogrooming ): Varroa free vs Varroa infested
1	Morning	Varroa free	CA	0	66	Varroa free: uninfested bees
1	Afternoon	Varroa free	CA	2	38	Varroa infested: phoretic infestation (50% infestation level per cage)
1	Evening	Varroa free	CA	3	55	Allogrooming: number of allogrooming events (frequency)
2	Morning	Varroa free	CA	0	49	Selfgrooming: number of allogrooming events (frequency)
2	Afternoon	Varroa free	CA	2	76
2	Evening	Varroa free	CA	0	35
3	Morning	Varroa free	CA	1	49
3	Afternoon	Varroa free	CA	2	80
3	Evening	Varroa free	CA	1	44
1	Morning	Varroa free	CB	0	46
1	Afternoon	Varroa free	CB	5	48
1	Evening	Varroa free	CB	1	32
2	Morning	Varroa free	CB	0	91
2	Afternoon	Varroa free	CB	1	63
2	Evening	Varroa free	CB	0	102
3	Morning	Varroa free	CB	3	37
3	Afternoon	Varroa free	CB	1	42
3	Evening	Varroa free	CB	0	45
1	Morning	Varroa free	CC	0	104
1	Afternoon	Varroa free	CC	1	88
1	Evening	Varroa free	CC	2	67
2	Morning	Varroa free	CC	3	64
2	Afternoon	Varroa free	CC	0	59
2	Evening	Varroa free	CC	1	78
3	Morning	Varroa free	CC	1	90
3	Afternoon	Varroa free	CC	0	66
3	Evening	Varroa free	CC	3	80
1	Morning	Varroa infested	VA	0	159
1	Afternoon	Varroa infested	VA	0	138
1	Evening	Varroa infested	VA	0	130
2	Morning	Varroa infested	VA	5	122
2	Afternoon	Varroa infested	VA	7	120
2	Evening	Varroa infested	VA	0	151
3	Morning	Varroa infested	VA	1	139
3	Afternoon	Varroa infested	VA	5	118
3	Evening	Varroa infested	VA	0	152
1	Morning	Varroa infested	VB	0	128
1	Afternoon	Varroa infested	VB	0	75
1	Evening	Varroa infested	VB	0	110
2	Morning	Varroa infested	VB	2	80
2	Afternoon	Varroa infested	VB	0	141
2	Evening	Varroa infested	VB	0	73
3	Morning	Varroa infested	VB	5	80
3	Afternoon	Varroa infested	VB	2	149
3	Evening	Varroa infested	VB	0	120
1	Morning	Varroa infested	VC	1	90
1	Afternoon	Varroa infested	VC	0	120
1	Evening	Varroa infested	VC	2	87
2	Morning	Varroa infested	VC	1	133
2	Afternoon	Varroa infested	VC	1	115
2	Evening	Varroa infested	VC	1	121
3	Morning	Varroa infested	VC	5	90
3	Afternoon	Varroa infested	VC	3	120
3	Evening	Varroa infested	VC	0	86
